# Supplementary material for: Evaluating the precision of Pb isotope measurement by mass spectrometry
Source: Royal Society of Chemistry journal article supplement (doi:10.1039/c4ja00279b), 2014-10-03
Supplement: c4ja00279b1.xlsx [file c4ja00279b1.xlsx]

## Sheet: Table S1
																							206Pb/204Pb		207Pb/204Pb		208Pb/204Pb
				206Pb/204Pb	± 2sd	207Pb/204Pb	± 2sd	208Pb/204Pb	± 2sd	207Pb/206Pb	± 2sd	208Pb/206Pb	± 2sd	2sd ppm. amu-1	D207Pb	± 2sd	D208Pb	± 2sd	n =	f	β		± 2sd (ppm)		± 2sd (ppm)		± 2sd (ppm)
This study: non-double spike determinations	TIMS f = c, 981 standards			16.9403	0.0247955	15.4979	0.0324376	36.7213	0.101271	0.914856	0.000608755	2.16769	0.00291455	706.327	17.0578	2.97722	61.3544	7.19938	165	0.00131354			731.85		697.677		689.455
	TIMS f = c, samples normalised to 981			16.9403	0.0469389	15.4979	0.0641856	36.7213	0.201989	0.914856	0.000608755	2.16769	0.00291455	1380.37	17.0578	5.89114	61.3544	14.3595	834	0.00119			1385.42		1380.52		1375.15
	MC-ICP-MS Neptune thallium spike			16.9395	0.00694393	15.4964	0.00809735	36.7154	0.0254595	0.91481	0.00018259	2.16744	0.000771032	184.166	16.9161	0.788607	60.8592	1.95511	105	-0.00664255	1.35773		204.963		174.177		173.357
	MC-ICP-MS Neptune sample-std			16.9415	0.00662003	15.4985	0.00839153	36.7212	0.0276247	0.914827	0.000152374	2.16754	0.000751664	187.977	17.1064	0.8	61.2011	2.1	215	-0.00584158	1.19771		195.379		180.48		188.07
poly-spike study		method	Instrument
This study Southampton Sector 54		DS (204-207)1	TIMS	16.9402	0.00274004	15.4981	0.0027386	36.7222	0.00749095	0.914869	8.33742e-05	2.16775	0.000174921	63.5909	17.0864	0.242569	61.4276	0.43752	107	0.0014484	-0.259073		80.8737		58.9017		50.9974
This study GSJ Sector 54		DS (204-207)1	TIMS	16.9403	0.0029	15.5	0.0038	36.7224	0.009	0.914974	8e-05	2.16775	0.00011	76.1952	17.3	0.36	61.5	0.58	15	0.0008			85.5947		81.7204		61.2705
This study Neptune		DS (204-207)1	MC-ICP-MS	16.9415	0.00224888	15.4985	0.00210749	36.7212	0.00626905	0.914827	5.93871e-05	2.16754	0.000168197	51.4596	17.1076	0.198329	61.2032	0.422033	94	-0.00584158	1.19771		66.3722		45.3267		42.68
Galer and Abouchami, 1998		TS (204-206-207)2	TIMS	16.9405	0.0015	15.4963	0.0016	36.7219	0.0044	0.91475	4e-05	2.16771	0.0001	36.2148	16.895		61.3835						44.2726		34.4168		29.9549
Thirlwall, 2002		DS (204-207)3	TIMS	16.9408	0.0021	15.498	0.0025	36.722	0.008	0.914833	7e-05	2.16767	0.00041	56.7381	17.0617		61.3573						61.9805		53.7704		54.4633
Thirlwall, 2002		DS (204-207)3	MC-ICP-MS	16.9417	0.0029	15.4996	0.0031	36.724	0.008	0.91488	8e-05	2.1677	0.00024	68.9054	17.212		61.4485						85.5876		66.6684		54.4603
Kuritani and Nakamura, 2003		DSx2 (204-5/204-7)	TIMS	16.9414	0.0028	15.4992	0.0029	36.723	0.0075	0.914871	5.40628e-05	2.16765	0.0001807	65.3548	17.1752		61.3847						82.6378		62.3688		51.0579
Baker et al., 2004		DS (204-207)1	MC-ICP-MS	16.9416	0.0013	15.5	0.0015	36.7262	0.0031	0.914905	3.9e-05	2.16781	0.00012	30.5758	17.2531		61.6806						38.3671		32.2581		21.1021
Amelin and Davis, 2006*		DS (202-205)5	TIMS	16.9408	0.00117302	15.4987	0.00113277	36.7278	0.00291763	0.914873	1.19127e-05	2.168	4.94948e-05	26.2812	17.1332		61.9331						34.6211		24.3626		19.8598
Makishima et al 2007		DS (204-207)4	MC-ICP-MS	16.9417	0.0024	15.4988	0.0025	36.7196	0.0066	0.914831	4.64689e-05	2.16741	0.000158052	56.5113	17.132		61.0085						70.8311		53.7676		44.9351
Mainz average 2000-2008		TS (204-206-207)2	TIMS	16.9415	0.000660942	15.4984	0.00214	36.7264	0.00595	0.914817	3.82703e-05	2.16784	0.00013934	35.3451	17.0912		61.7109						19.5066		46.0263		40.5022
Hoernle et al, 2011		DS (204-207)1	TIMS	16.9416	0.0024	15.4998	0.0024	36.7231	0.0063	0.9149	5e-05	2.16763	0.00013	55.1112	17.2331		61.3706						70.8316		51.6136		42.8885
Makishima and Nakamura, 2010**		DS (204-207)4	MC-ICP-MS	16.9414	0.00304954	15.4991	0.00340989	36.7233	0.00771223	0.914859	4.57429e-05	2.16766	0.00018842	71.9467	17.1597		61.4087						90.0022		73.3355		52.5023
NIST SRM 981 poly-spike average				16.9412	0.000301991	15.4988	0.000563596	36.7233	0.00126294	0.914861	2.94969e-05	2.1677	8.00327e-05	53.4023	17.1383	0.0569271	61.4455	0.127971					63.9599		52.6567		43.5903
Todt et al.,1996		DS (202-205)	TIMS	16.9356		15.4891		36.7006		0.914588		2.16707
Todt et al.,1984			TIMS	16.9374		15.4926		36.7067		0.9147		2.1672
Catanzaro et al., 1968			TIMS	16.9371		15.4913		36.7213		0.91464		2.1681
Todt et al.,1996 to poly-spike conversion factors				1.00033		1.00063		1.00062		1.0003		1.00029
Todt et al.,1984 to poly-spike conversion factors				1.00022		1.0004		1.00045		1.00018		1.00023
Catanzaro et al., 1968 to poly-spike conversion factors				1.00024		1.00048		1.00005		1.00024		0.999816
* - recalculated to 982 208Pb/206Pb = 1.00016, ** = 1-5ng average, italic numbers are 2se
Methods DS = double spike; TS = triple spike. Spike ID: 1 = SBL74 (Southampton) spike; 2 Mainz spike; 3 = Royal Holloway spike; 4 = PML, Japan; 5 = Geological Survey of Canada
Table S1	Expanded version of Table 1, including data for: ∆Pb values; average mass fractionation coefficients expressed as linear function (f ) and exponential function (β); uncertainties expressed as ppm.amu-1.

## Sheet: Table S2
dive number	sample number	latitude oN	longitude oE	water depth (m)	group		206Pb/204Pb	± 2se	207Pb/204Pb	± 2se	208Pb/204Pb	± 2se	D207Pb	D208Pb
1001	1	34.8084	139.212	800.6	NW-1		18.4062	8.33202	15.5483	7.89213	38.3274	24.7683	6.20477	44.7292
1001	5	34.8051	139.215	729.1	NW-1		18.4051	7.56965	15.5482	7.17163	38.3278	22.5164	6.20768	44.8967
1001	6	34.8041	139.22	804.9	NW-1		18.4048	11.6772	15.5474	11.0651	38.326	34.7565	6.13567	44.7625
1001	11	34.7997	139.231	690.1	NW-1		18.4034	8.04908	15.5464	7.62677	38.3226	23.9527	6.04611	44.5898
1002	3	34.7954	139.236	561.7	NW-1		18.4055	17.0359	15.5479	16.14	38.3276	50.6792	6.17291	44.8332
994	6	34.7944	139.295	603.9	NW-2		18.4211	5.59461	15.551	5.2974	38.3411	16.6391	6.3183	44.2974
995	13	34.8239	139.306	318.7	NW-2		18.4258	11.4429	15.5506	10.8288	38.3463	33.9961	6.22857	44.2514
995	16	34.8228	139.308	244.2	NW-2		18.4241	7.52781	15.5493	7.12546	38.3425	22.3807	6.11393	44.0674
996	9	34.815	139.234	770.2	NW-2		18.428	7.87723	15.5509	7.45452	38.3473	23.4086	6.22903	44.0764
991	15	34.8583	139.242	944.9	NW-3		18.4184	16.3179	15.55	15.4494	38.3402	48.5083	6.24402	44.5386
992	1	34.8464	139.247	811.3	NW-3		18.4158	6.20831	15.5497	5.87924	38.3329	18.4619	6.24453	44.1215
995	2	34.7926	139.3	635.7	NW-3		18.4099	7.04628	15.5485	6.67286	38.3308	20.942	6.18678	44.6287
995	5	34.7941	139.296	629.4	NW-3		18.4101	16.0429	15.547	15.195	38.3262	47.7155	6.03203	44.1376
998	2	34.6441	139.467	475.2	SE-1		18.4156	18.0926	15.5495	17.1541	38.3383	54.0211	6.22709	44.687
998	4	34.6494	139.464	387.7	SE-1		18.4151	19.0233	15.5498	18.0366	38.3386	56.7912	6.25621	44.7767
1000	5	34.6863	139.486	425.1	SE-1		18.4101	18.7067	15.5471	17.7386	38.327	55.8492	6.04056	44.2166
1000	11	34.6893	139.48	352.6	SE-1		18.4111	17.9024	15.5481	16.9757	38.3301	53.4482	6.13478	44.4132
1004	12	34.6597	139.469	202.6	SE-1		18.4143	26.6087	15.548	25.2306	38.334	79.4776	6.08583	44.4056
1005	1	34.6587	139.455	280.9	SE-1		18.4142	16.9333	15.5489	16.0572	38.3361	50.5778	6.17894	44.6306
1005	8	34.6622	139.453	172.2	SE-1		18.4138	16.8617	15.5489	15.9893	38.3366	50.3625	6.18765	44.7287
1006	7	34.6598	139.421	106.1	SE-1		18.4127	19.1376	15.5495	18.1474	38.3365	57.1415	6.25432	44.8471
997	7	34.6574	139.449	278.2	SE2		18.4279	18.9881	15.5516	17.9938	38.3514	56.6801	6.29799	44.5025
997	9	34.659	139.451	155.8	SE2		18.4276	17.6412	15.5511	16.717	38.3502	52.6572	6.25159	44.4289
999	3	34.6346	139.489	505.4	SE2		18.428	18.5352	15.5511	17.5642	38.3505	55.3273	6.25513	44.4081
999	5	34.6357	139.488	494.9	SE2		18.4299	20.8518	15.5528	19.7584	38.3546	62.2289	6.39627	44.5836
999	9	34.6414	139.484	222.4	SE2		18.4231	19.6313	15.5484	18.6073	38.3412	58.6302	6.03154	44.0737
999	12	34.6434	139.48	263.6	SE2		18.4274	16.9168	15.551	16.0315	38.3498	50.5035	6.24316	44.4035
1004	1	34.6498	139.473	363.6	SE2		18.4285	18.6649	15.5513	17.6863	38.3501	55.7043	6.26256	44.3031
1005	16	34.6637	139.443	256.9	SE2		18.4231	17.6026	15.5501	16.6842	38.3439	52.5525	6.20376	44.3386
± 2se values refer to the last digits of the isotope ratio
Table S2 Pb isotope ratios for basalt samples from dyke/fissure swarms to the NW and SE of Izu-Oshima, Japan. Propagated uncertainties for individual isotope ratios are quoted as ±2se of the means of the unspiked and double spiked runs; each run consisting of 150 measurements of 4 second integrations using the Neptune MC-ICP-MS at University of Southampton. Further information on the samples and …
References
1 O. Ishizuka, N. Geshi, Y. Kawanabe, I. Ogitsu, R. N. Taylor, T. Tuzino, I. Sakamoto, K. Arai and S. Nakano, Journal of Volcanology and Geothermal Research, 2014, 285, 1-17.
